# Supplementary material for: Control of the Verticillium Wilt on Tomato Plants by Means of Olive Leaf Extracts Loaded on Chitosan Nanoparticles
Source: MDPI journal article supplement (doi:10.3390/microorganisms10010136), 2022-01-10
Supplement: s1 [file s1]

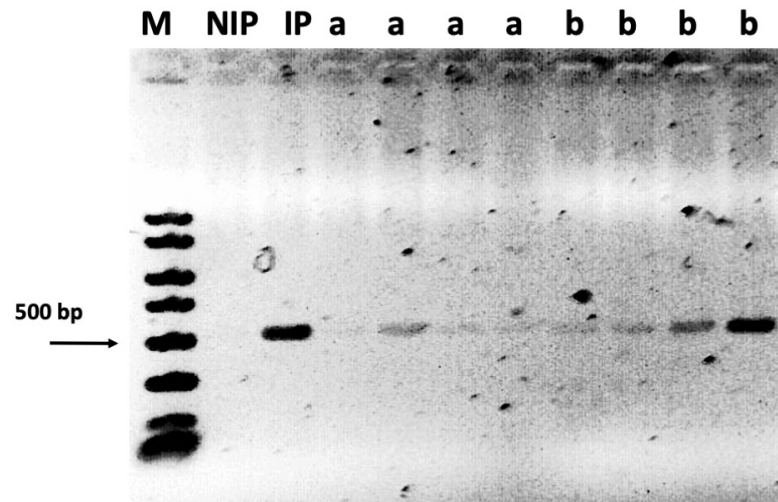

**Figure S1.** PCR amplification of *Verticillium dahliae* in tomato leaves. M: DNA molecular weight marker; NIP: non infected plants (Negative CTR); IP: infected plant non treated (Positive CTR); a: infected plant and treated with OLE-loaded CTNPs at concentration 1.41 mg/mL; b: infected plant and treated with OLE-loaded CTNPs at concentration 0.71 mg/mL.
